# Supplementary material for: Land Use Change Influences Ecosystem Function in Headwater Streams of the Lowland Amazon Basin
Source: MDPI journal article supplement (doi:10.3390/w13121667), 2021-06-15

## **Appendix**

Supplemental Methods: Methods used for watershed delineation, estimation of stream gas exchange velocity, and calculation of nutrient uptake metrics.

Table S1 – Streams included in the study and what was measured

Table S2 – Mean and variation in background nitrogen and phosphorus concentrations of all streams in the study

Table S3 - Estimated gas exchange coefficients used as prior values in metabolism models.

Table S4 – Estimation approach and values used for parameters in metabolism model

Table S5 – Nutrient addition reach lengths

Table S6 - AFDM, C and N of litterfall components

Table S7 – Posterior mean estimates of metabolism estimates for all streams, seasons

Table S8 – Comparison of mixed models evaluating effects of land use and season on gross primary production (GPP), ecosystem respiration (ER) and net ecosystem production (NEP) using AIC.

Figure S1 – Modeled versus measured PAR

Figure S2 - % C and % N of litterfall

Figure S3 - % C and % N of stream organic matter

Figure S4 - Annual cycle of LAI in riparian forests in forest and cropland streams

Any use of trade, firm, or product names is for descriptive purposes only and does not imply endorsement by the U.S. Government.

## **Supplemental Methods**

## Watershed Delineation

The study watersheds were delineated based on a 30-m digital elevation model (DEM), derived from the Shuttle Radar Topography Mission (SRTM) elevation dataset, using the Hydrology Tools in the ArcMap 10.6 Spatial Analyst package. Watersheds were defined as the area upstream of the GPS location for each sampling site (i.e. the outlet or “pour point”). Landcover was determined by way of an unsupervised classification of a Landsat Thematic Mapper 8 image of the region collected on September 9, 2017. An initial classification of 25 classes was reduced to the four classes deemed pertinent to this study (intact closed canopy forest, degraded forest, cropland, and surface water). Finally, landcover statistics were extracted from the 4-class landcover map for each of the watersheds in the study.

## Metabolism Modeling

### *Estimation of gas exchange velocity ( $k$ )*

We used physically based equations to generate values of  $k$  which we used as priors to constrain the model-based estimation of  $k$ . We calculated  $k$  using equations derived from the Energy dissipation model and updated by Raymond et al. 2012. We compared values generated when using equations with and without stream depth, but estimates seemed overly sensitive to depth (as suggested in Raymond et al. 2012) so we used the model that had the highest explanatory power but only required only velocity and slope data. We used these calculated values (Table A3) to generate a mean and standard deviation value for  $k$  for each stream, which we included as a normal prior to constrain the model-generated estimates of  $k$  (Tables A3 & A4). In cases where we lacked data to make these estimates (e.g., stream slope), we used the grand mean and standard deviation of all streams of the same type (i.e., cropland or forest) to inform the prior.

### Calculation of nutrient spiraling metrics

We calculated mass recovery as in equation 1 and based our uptake metrics off that calculation:

$$1) T_{MR} = Q \int_0^t T_c(t) dt$$

Where  $T_{MR}$  is the tracer mass recovery (M, mg) and  $T_c$  is the time-integrated tracer concentrations of background corrected Cl or nutrient concentration ( $\text{mg} \cdot \text{L}^{-1} \cdot \text{s}$ ),  $Q$  is discharge ( $\text{L} \cdot \text{s}^{-1}$ ), and  $t$  is the time step. From the Cl and  $\text{NO}_3\text{-N}$   $T_{MR}$  values, we calculated the BTC-integrated uptake length of the added nutrient ( $S_w$ ). We calculated  $S_w$  by plotting the natural log of the added nutrient to Cl ratio (e.g.,  $\text{NO}_3\text{-N}:\text{Cl}$ ) and the BTC-integrated nutrient to Cl ratio [e.g.,  $T_{MR}(\text{NO}_3\text{-N}):T_{MR}(\text{Cl})$ ] ratio against stream distance, similar to the approaches used by Covino et al. (2010) and Tank et al. (2008) The slope of the line derived from these data is the BTC-integrated longitudinal uptake rate of added nutrient ( $k_w$ ), and  $S_w$  is the negative inverse of  $k_w$ . We calculated BTC-integrated nutrient areal uptake rates ( $U$ ) and uptake velocities ( $V_f$ ) as follows of the added nutrients (N):

$$2) U = \frac{Q \cdot [N_{add-int}]}{S_w}$$

$$3) V_f = \frac{U}{[N_{add-int}]}$$

## **References**

Covino TP, McGlynn BL, McNamara RA. Tracer Additions for Spiraling Curve Characterization (TASCC): Quantifying stream nutrient uptake kinetics from ambient to saturation. *Limnol Oceanogr-METHODS*. 2010 Sep;8: 484–98.

Raymond PA, Zappa CJ, Butman D, Bott TL, Potter J, Mulholland P, et al. Scaling the gas transfer velocity and hydraulic geometry in streams and small rivers: Gas transfer velocity and hydraulic geometry. *Limnol Oceanogr Fluids Environ*. 2012 Apr;2(1):41–53.

Tank JL, Rosi-Marshall EJ, Baker MA, Hall RO Jr. Are rivers just big streams? A pulse method to quantify nitrogen demand in a large river. *Ecology*. 2008 Oct;89(10):2935–45.

Table S1 – Watersheds included in the study and what was measured. LAI = leaf area index. OM = benthic organic matter.

|                | APP 2       | APP 2a | APP M  | CN          | Casca-<br>vel | Nas-<br>cente | APP 6 | APP 3         | APP 4         | APP 5         |
|----------------|-------------|--------|--------|-------------|---------------|---------------|-------|---------------|---------------|---------------|
|                | For-<br>est | Forest | Forest | For-<br>est | Soy           | Soy           | Soy   | Soy-<br>Maize | Soy-<br>Maize | Soy-<br>Maize |
| Discharge      | x           | x      | x      | x           | x             | x             | x     | x             | x             | x             |
| Temp           | x           | x      | x      | x           | x             | x             | x     | x             | x             | x             |
| LAI            | x           | x      | x      | x           | x             | x             | x     | x             | x             | x             |
| Nutrients      | x           | x      | x      |             | x             | x             | x     | x             | x             | x             |
| Litter         | x           | x      | x      | x           | x             | x             | x     | x             | x             | x             |
| Stream habitat | x           | x      | x      |             | x             | x             | x     |               |               |               |
| OM             | x           | x      | x      |             | x             | x             | x     |               |               |               |
| Metabolism     | x           | x      | x      |             | x             | x             | x     | x             | x             |               |

|                    |   |   |   |  |   |   |   |  |  |  |
|--------------------|---|---|---|--|---|---|---|--|--|--|
| Nutrient additions | x | x | x |  | x | x | x |  |  |  |
|--------------------|---|---|---|--|---|---|---|--|--|--|

Table S2 - Mean and variation in stream nitrate (NO<sub>3</sub>-N) and phosphate (PO<sub>4</sub>-P) concentrations for watersheds included in the study from 2013-2016.

| Watershed | Land Use | NO <sub>3</sub> -N<br>(mg/L) | PO <sub>4</sub> -P<br>(mg/L) |
|-----------|----------|------------------------------|------------------------------|
| APP2      | Forest   | 0.042 ±<br>0.089             | 0.007 ±<br>0.003             |
| APP2A     | Forest   | 0.040 ±<br>0.058             | 0.007 ±<br>0.003             |
| APPM      | Forest   | 0.046 ±<br>0.065             | 0.006 ±<br>0.003             |
| Cascavel  | Soy      | 0.034 ±<br>0.147             | 0.005 ±<br>0.004             |
| APP67     | Soy      | 0.033 ±<br>0.059             | 0.005 ±<br>0.034             |

|      |           |                  |                  |
|------|-----------|------------------|------------------|
| APP3 | Soy-maize | 0.022 ±<br>0.064 | 0.005 ±<br>0.003 |
| APP4 | Soy-maize | 0.029 ±<br>0.057 | 0.006 ±<br>0.004 |
| APP5 | Soy-maize | 0.052 ±<br>0.087 | 0.006 ±<br>0.004 |

Table S3 - Estimated gas transfer velocity standardized to 20 °C ( $k_{20}$ ) values from Energy Dissipation Model (EDM; Raymond et al. 2012) used as mean values of a normal prior in ecosystem metabolism model (Holtgrieve et al. 2010). nm = not measured.

| Stream | Date      | Land Use | Season | Velocity (m/s) | Mean depth (m) | Slope (m/m) | EDM $k_{20}$ (m/h) |
|--------|-----------|----------|--------|----------------|----------------|-------------|--------------------|
| APP2   | 2/1/2015  | Forest   | Wet    | 0.08           | 0.22           | 0.0015      | 0.09               |
| APP2   | 11/10/15  | Forest   | Dry    | 0.06           | 0.25           | 0.0015      | 0.08               |
| APP2   | 1/1/2016  | Forest   | Wet    | 0.11           | 0.33           | 0.0015      | 0.09               |
| APP2   | 10/1/16   | Forest   | Dry    | 0.08           | 0.27           | 0.0015      | 0.09               |
| APP2a  | 11/9/2015 | Forest   | Dry    | 0.07           | 0.15           | 0.0023      | 0.07               |
| APP2a  | 1/1/2016  | Forest   | Wet    | 0.09           | 0.25           | 0.0023      | 0.10               |

|          |          |        |     |      |      |        |      |
|----------|----------|--------|-----|------|------|--------|------|
| APP2a    | 10/1/16  | Forest | Dry | 0.07 | 0.2  | 0.0023 | 0.09 |
| APP3     | 11/9/15  | Crop   | Dry | 0.15 | 0.29 | 0.0033 | 0.13 |
| APP4     | 2/1/2015 | Crop   | Wet | 0.27 | 0.63 | 0.0045 | 0.20 |
| APP4     | 11/13/15 | Crop   | Dry | 0.29 | 0.52 | 0.0045 | 0.21 |
| APP6*    | 1/1/2016 | Crop   | Wet | 0.1  | 0.29 | nm     |      |
| APP6*    | 10/1/16  | Crop   | Dry | 0.04 | 0.25 | nm     |      |
| APP67*   | 2/1/2015 | Crop   | Wet | n.d. | 0.45 | nm     |      |
| APPM     | 2/1/2015 | Forest | Wet | 0.15 | 0.25 | 0.0016 | 0.10 |
| APPM     | 11/16/15 | Forest | Dry | 0.12 | 0.26 | 0.0016 | 0.09 |
| APPM     | 1/1/2016 | Forest | Wet | 0.15 | 0.42 | 0.0016 | 0.10 |
| APPM     | 10/1/16  | Forest | Dry | 0.11 | 0.26 | 0.0016 | 0.09 |
| Cascavel | 1/1/2016 | Crop   | Wet | 0.11 | 0.39 | 0.0054 | 0.14 |
| Cascavel | 10/1/16  | Crop   | Dry | 0.09 | 0.35 | 0.0054 | 0.13 |
| Nascente | 1/1/2016 | Crop   | Wet | 0.13 | 0.37 | 0.0059 | 0.15 |
| Nascente | 10/1/16  | Crop   | Dry | 0.14 | 0.35 | 0.0059 | 0.16 |

\* In cases where no data were available, we used the land use mean.

Table S4. Metabolism model equations for the two-stage respiration ( $R$ ) and photosynthesis ( $P$ ) submodels used to estimate metabolism.  $I$  = irradiance data and  $T$  = water temperature data.  $K_b$  is the Boltzmann constant ( $8.62 \times 10^{-5} \text{ J } ^\circ\text{K}^{-1}$ ). The table shows the estimation mode for parameters.

$$P(I) = \alpha_{P-I} I$$

$$R(T) = R_{ref} * e^{\frac{-Et(T-T_{ref})}{K_b T T_{ref}}}$$

| Parameter                                                              | Definition                                                | Mode of estimation | Value                                             |
|------------------------------------------------------------------------|-----------------------------------------------------------|--------------------|---------------------------------------------------|
| $\alpha_{P-I}$ (mg O <sub>2</sub> s uE <sup>-1</sup> h <sup>-1</sup> ) | slope of photosynthesis-irradiance relationship           | free parameter     |                                                   |
| $T_{ref}$ (C)                                                          | Reference temperature used to standardize $R_{ref}$       | constant           | Mean stream temperature during measurement period |
| $R_{ref}$ (mg O <sub>2</sub> m <sup>-2</sup> h <sup>-1</sup> )         | R at a reference temperature (average stream temperature) | free parameter     |                                                   |
| $E_b$ (eV)                                                             | temperature sensitivity of                                | constant           | 0.65                                              |

|                                                                     |                                             |               |                                                                               |
|---------------------------------------------------------------------|---------------------------------------------|---------------|-------------------------------------------------------------------------------|
|                                                                     | base respiration (Rb)                       |               |                                                                               |
| $k_{20}$ (m h <sup>-1</sup> )                                       | gas transfer velocity standardized to 20 °C | normal prior  | Mean and standard deviation based on slope and velocity (Raymond et al. 2012) |
| Initial O <sub>2</sub> concentration (mg L <sup>-1</sup> )          |                                             | uniform prior | 5 - 15                                                                        |
| $\sigma$ Initial O <sub>2</sub> concentration (mg L <sup>-1</sup> ) |                                             | uniform prior | 0.0001 – 1                                                                    |

Table S5 – Stream reach lengths used for nutrient addition experiments (in meters).

| Stream   | Season | Nitrate | Phosphate |
|----------|--------|---------|-----------|
| APP2     | Jan    | 100     | 100       |
| APP2a    | Jan    | 150     | 150       |
| APPM     | Jan    | 255     | 255       |
| APP6     | Jan    | 60      | 60        |
| Cascavel | Jan    | 305     | 305       |
| Nascente | Jan    | 100     | 100       |
| APP2     | Oct    | 150     | 150       |
| APP2a    | Oct    | 100     | 100       |
| APPM     | Oct    | 150     | 150       |
| APP6     | Oct    | 90      | 90        |
| Cascavel | Oct    | 213     | 213       |
| Nascente | Oct    | 200     | 200       |

Table S6 – Organic content (measured as ash-free dry mass (AFDM)), and the mass of carbon (C) and nitrogen (N) of litterfall components by land use and across years. P-values reflect results of two-way ANOVA testing the effects of land use and season and are indicated by bold font and \*. Values given as mean  $\pm$  standard error.

| Annual Input<br>(g m <sup>-2</sup> y <sup>-1</sup> ) | Forest        |               | Cropland      |               | Source of variation          |                          |                                 |
|------------------------------------------------------|---------------|---------------|---------------|---------------|------------------------------|--------------------------|---------------------------------|
|                                                      | Year 1        | Year 2        | Year 1        | Year 2        | <i>P</i> <sub>land use</sub> | <i>P</i> <sub>year</sub> | <i>P</i> <sub>interaction</sub> |
| <i>Leaf</i>                                          |               |               |               |               |                              |                          |                                 |
| AFDM                                                 | 489 $\pm$ 15  | 446 $\pm$ 19  | 369 $\pm$ 43  | 369 $\pm$ 75  | 0.070                        | 0.596                    | 0.939                           |
| C                                                    | 241 $\pm$ 7   | 219 $\pm$ 9   | 180 $\pm$ 21  | 181 $\pm$ 37  | 0.069                        | 0.599                    | 0.939                           |
| N                                                    | 5.6 $\pm$ 0.4 | 5.1 $\pm$ 0.5 | 3.3 $\pm$ 0.3 | 3.5 $\pm$ 0.8 | <b>0.006*</b>                | 0.627                    | 0.943                           |
| <i>Wood</i>                                          |               |               |               |               |                              |                          |                                 |
| AFDM                                                 | 25 $\pm$ 3    | 56 $\pm$ 24   | 23 $\pm$ 6    | 40 $\pm$ 15   | 0.356                        | 0.101                    | 0.766                           |
| C                                                    | 12 $\pm$ 1    | 28 $\pm$ 12   | 11 $\pm$ 3    | 20 $\pm$ 7    | 0.357                        | 0.101                    | 0.766                           |
| N                                                    | 0.2 $\pm$ 0.1 | 0.5 $\pm$ 0.2 | 0.2 $\pm$ 0.1 | 0.4 $\pm$ 0.2 | 0.976                        | 0.123                    | 0.757                           |
| <i>Seed</i>                                          |               |               |               |               |                              |                          |                                 |
| AFDM                                                 | 9 $\pm$ 3     | 7 $\pm$ 3     | 48 $\pm$ 17   | 19 $\pm$ 12   | <b>0.036*</b>                | 0.061                    | 0.444                           |
| C                                                    | 4 $\pm$ 1     | 3 $\pm$ 1     | 24 $\pm$ 8    | 9 $\pm$ 6     | <b>0.040*</b>                | 0.060                    | 0.444                           |
| N                                                    | 0.1 $\pm$ 0.1 | 0.1 $\pm$ 0.1 | 0.6 $\pm$ 0.2 | 0.3 $\pm$ 0.1 | <b>0.009*</b>                | 0.040                    | 0.484                           |
| <i>Total litterfall</i>                              |               |               |               |               |                              |                          |                                 |
| AFDM                                                 | 524 $\pm$ 16  | 509 $\pm$ 27  | 441 $\pm$ 53  | 429 $\pm$ 83  | 0.147                        | 0.660                    | 0.851                           |
| C                                                    | 258 $\pm$ 8   | 251 $\pm$ 13  | 216 $\pm$ 26  | 211 $\pm$ 41  | 0.144                        | 0.663                    | 0.854                           |
| N                                                    | 6 $\pm$ 0.3   | 5 $\pm$ 0.2   | 4 $\pm$ 0.3   | 4 $\pm$ 0.9   | <b>0.022*</b>                | 0.605                    | 0.818                           |

Table S7 – Median values of posterior metabolism estimates of for all streams across all years of the study. Gross primary production (GPP) was undetectable in several cases, which is denoted by a value of 0.1 mg m<sup>-2</sup> d<sup>-1</sup>. ER = ecosystem respiration, G = gas exchange, *k* = gas exchange velocity, and NEP = net ecosystem production.

| Stream        | Year | Land Use | Season              | GPP (mg m <sup>-2</sup> d <sup>-1</sup> ) | ER (mg m <sup>-2</sup> d <sup>-1</sup> ) | G (mg m <sup>-2</sup> d <sup>-1</sup> ) | <i>k</i> (m h <sup>-1</sup> ) | NEP (mg m <sup>-2</sup> d <sup>-1</sup> ) |
|---------------|------|----------|---------------------|-------------------------------------------|------------------------------------------|-----------------------------------------|-------------------------------|-------------------------------------------|
| APP2          | 2015 | Forest   | Dry                 | 0.1                                       | 4,208                                    | 4,206                                   | 0.07                          | -4,208                                    |
| APP2          | 2016 | Forest   | Dry                 | 420                                       | 7,697                                    | 7,285                                   | 0.13                          | -7,277                                    |
| APP2a         | 2015 | Forest   | Dry                 | 0.1                                       | 2,223                                    | 2,217                                   | 0.02                          | -2,223                                    |
| APP2a         | 2016 | Forest   | Dry                 | 0.1                                       | 4,002                                    | 4,008                                   | 0.13                          | -4,002                                    |
| APPM          | 2016 | Forest   | Dry                 | 0.1                                       | 3,294                                    | 3,294                                   | 0.07                          | -3,294                                    |
|               |      |          | <b>Forest - Dry</b> | <b>84</b>                                 | <b>4,285</b>                             | <b>4,202</b>                            | <b>0.08</b>                   | <b>-4,201</b>                             |
| APP2          | 2015 | Forest   | Wet                 | 0.1                                       | 4,002                                    | 4,002                                   | 0.08                          | -4,002                                    |
| APP2          | 2016 | Forest   | Wet                 | 0.1                                       | 2,517                                    | 2,520                                   | 0.04                          | -2,517                                    |
| APP2a         | 2016 | Forest   | Wet                 | 0.1                                       | 3,408                                    | 3,406                                   | 0.04                          | -3,408                                    |
| APPM          | 2016 | Forest   | Wet                 | 0.1                                       | 6,141                                    | 6,127                                   | 0.11                          | -6,141                                    |
|               |      |          | <b>Forest - Wet</b> | <b>0.01</b>                               | <b>4,017</b>                             | <b>4,014</b>                            | <b>0.07</b>                   | <b>-4,017</b>                             |
| APP3          | 2015 | Crop     | Dry                 | 0.1                                       | 524                                      | 523                                     | 0.04                          | -524                                      |
| APP4          | 2015 | Crop     | Dry                 | 1,885                                     | 2,978                                    | 1,129                                   | 0.04                          | -1,093                                    |
| Casca-<br>vel | 2016 | Crop     | Dry                 | 0.1                                       | 3,376                                    | 3,383                                   | 0.04                          | -3,376                                    |
| Nas-<br>cente | 2016 | Crop     | Dry                 | 1.0                                       | 100                                      | 99                                      | 0.15                          | -99                                       |
| APP P         | 2018 | Crop     | Dry                 | 1,527                                     | 11,938                                   | 10,454                                  | 0.16                          | -10,411                                   |
|               |      |          | <b>Crop- Dry</b>    | <b>471</b>                                | <b>1,745</b>                             | <b>1,284</b>                            | <b>0</b>                      | <b>-1,273</b>                             |

|               |      |      |                      |            |              |              |             |               |
|---------------|------|------|----------------------|------------|--------------|--------------|-------------|---------------|
| APP4          | 2015 | Crop | Wet                  | 1,261      | 3,202        | 1,951        | 0.06        | -1,941        |
| APP6          | 2016 | Crop | Wet                  | 0.1        | 6,997        | 6,994        | 0.1         | -6,997        |
| APP67         | 2015 | Crop | Wet                  | 0.1        | 1,447        | 1,453        | 0.03        | -1,447        |
| Casca-<br>vel | 2016 | Crop | Wet                  | 0.1        | 4,043        | 4,019        | 0.05        | -4,043        |
| Nas-<br>cente | 2016 | Crop | Wet                  | 324        | 8,545        | 8,190        | 0.15        | -8,221        |
|               |      |      | <b>Crop-<br/>Wet</b> | <b>317</b> | <b>4,847</b> | <b>4,521</b> | <b>0.08</b> | <b>-4,530</b> |
|               |      |      | <b>Forest</b>        | <b>47</b>  | <b>4,166</b> | <b>4,118</b> | <b>0.08</b> | <b>-4,119</b> |
|               |      |      | <b>Crop</b>          | <b>386</b> | <b>3,468</b> | <b>3,082</b> | <b>0.07</b> | <b>-3,082</b> |

Table S8. AIC<sub>c</sub> and R<sup>2</sup> values of models comparing the effects of land use, season and their interaction on metabolism parameters: gross primary productivity (GPP), ecosystem respiration (ER) and net ecosystem production (NEP). df = degrees of freedom, N = sample size, AIC<sub>c</sub> = Akaike Information Criterion, ΔAIC<sub>c</sub> = difference in AIC<sub>c</sub> units from the best model, R<sup>2</sup><sub>m</sub> = marginal R-squared (fixed effects) and R<sup>2</sup><sub>c</sub> = conditional R<sup>2</sup> (full model with random effects).

|                  | df | N  | AIC <sub>c</sub> | ΔAIC | R <sup>2</sup> <sub>m</sub> | R <sup>2</sup> <sub>c</sub> |
|------------------|----|----|------------------|------|-----------------------------|-----------------------------|
| <b>GPP</b>       |    |    |                  |      |                             |                             |
| Season           | 5  | 17 | 258.3            | 0    | 0.01                        | 0.87                        |
| LandUse          | 5  | 17 | 258.4            | 0.1  | 0.1                         | 0.85                        |
| LandUse + Season | 6  | 17 | 259.5            | 1.2  | 0.1                         | 0.87                        |
| LandUse x Season | 7  | 17 | 261.5            | 3.2  | 0.1                         | 0.87                        |
| <b>ER</b>        |    |    |                  |      |                             |                             |
| LandUse x Season | 7  | 17 | 315.9            | 0    | 0.4                         | 0.4                         |
| Season           | 5  | 17 | 317.5            | 1.6  | 0.15                        | 0.15                        |
| LandUse + Season | 6  | 17 | 319.2            | 3.3  | 0.17                        | 0.17                        |
| LandUse          | 5  | 17 | 320              | 4.1  | 0.01                        | 0.02                        |
| <b>NEP</b>       |    |    |                  |      |                             |                             |
| LandUse x Season | 6  | 17 | 314.1            | 0    | 0.42                        | 0.42                        |
| Season           | 4  | 17 | 316.2            | 2.1  | 0.16                        | 0.16                        |
| LandUse + Season | 5  | 17 | 317.3            | 3.2  | 0.2                         | 0.2                         |

---

|         |   |    |       |     |      |      |
|---------|---|----|-------|-----|------|------|
| LandUse | 4 | 17 | 318.4 | 4.3 | 0.04 | 0.04 |
|---------|---|----|-------|-----|------|------|

Figure S1. Modeled photosynthetically active radiation (PAR) compared to measured PAR below the canopy in forest and cropland streams.

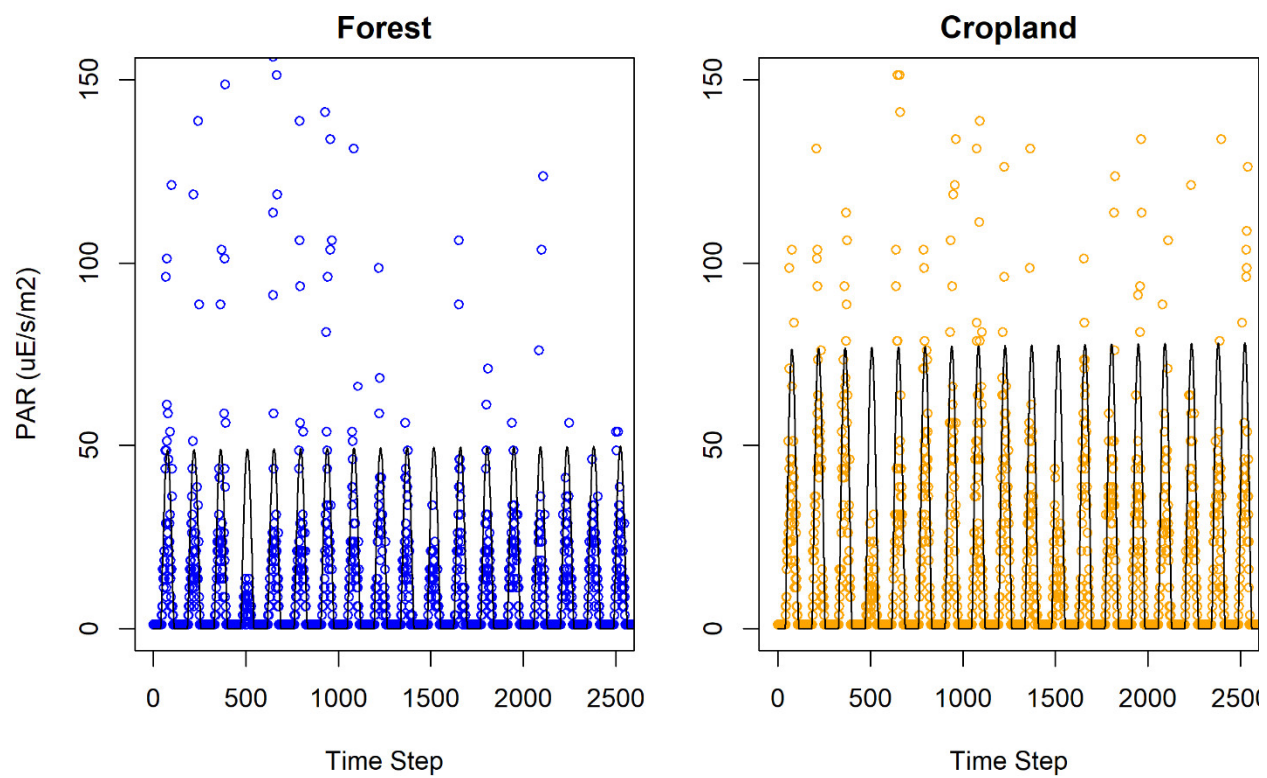

Figure S2 – % Carbon and % nitrogen of in litterfall in cropland and forest streams.

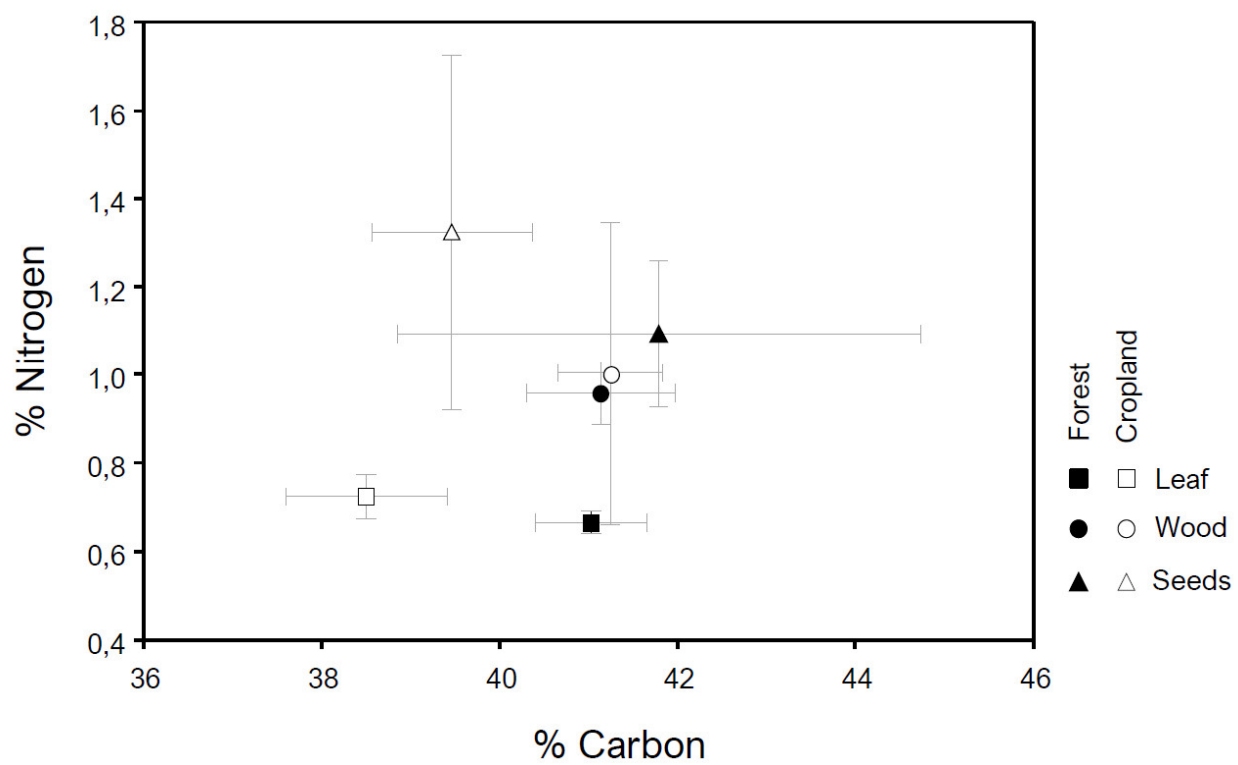

Figure S3 - % Carbon and % nitrogen of benthic organic matter in forest and cropland streams. FBOM = fine benthic organic matter.

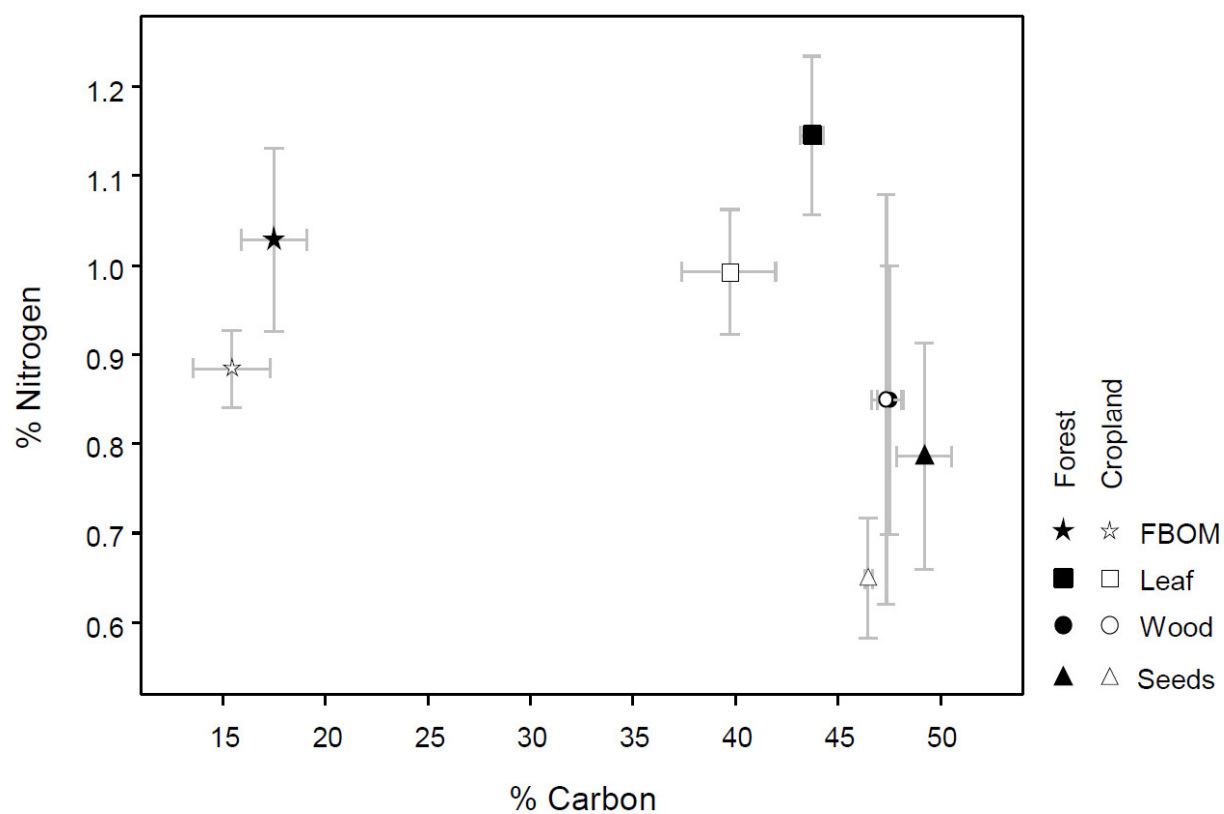

Figure S4. Leaf Area Index (LAI) measured over forest and cropland streams over two years. Points represent individual streams, bold lines indicate LOESS model fit to data for each land use and shaded regions are standard error around the model fit.

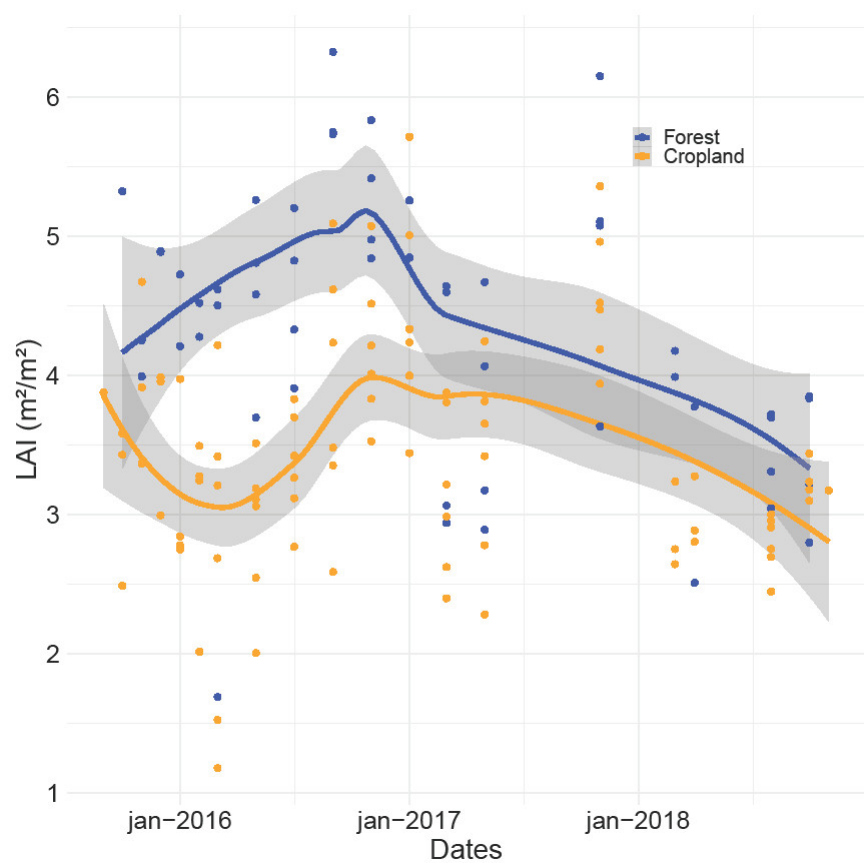

Supplement: s1 [file s1]
